# Supplementary figures and images for: The CaMK Family Differentially Promotes Necroptosis and Mouse Cardiac Graft Injury and Rejection
Source: MDPI journal article supplement (doi:10.3390/ijms25084428), 2024-04-17

Supplemental Figure S1

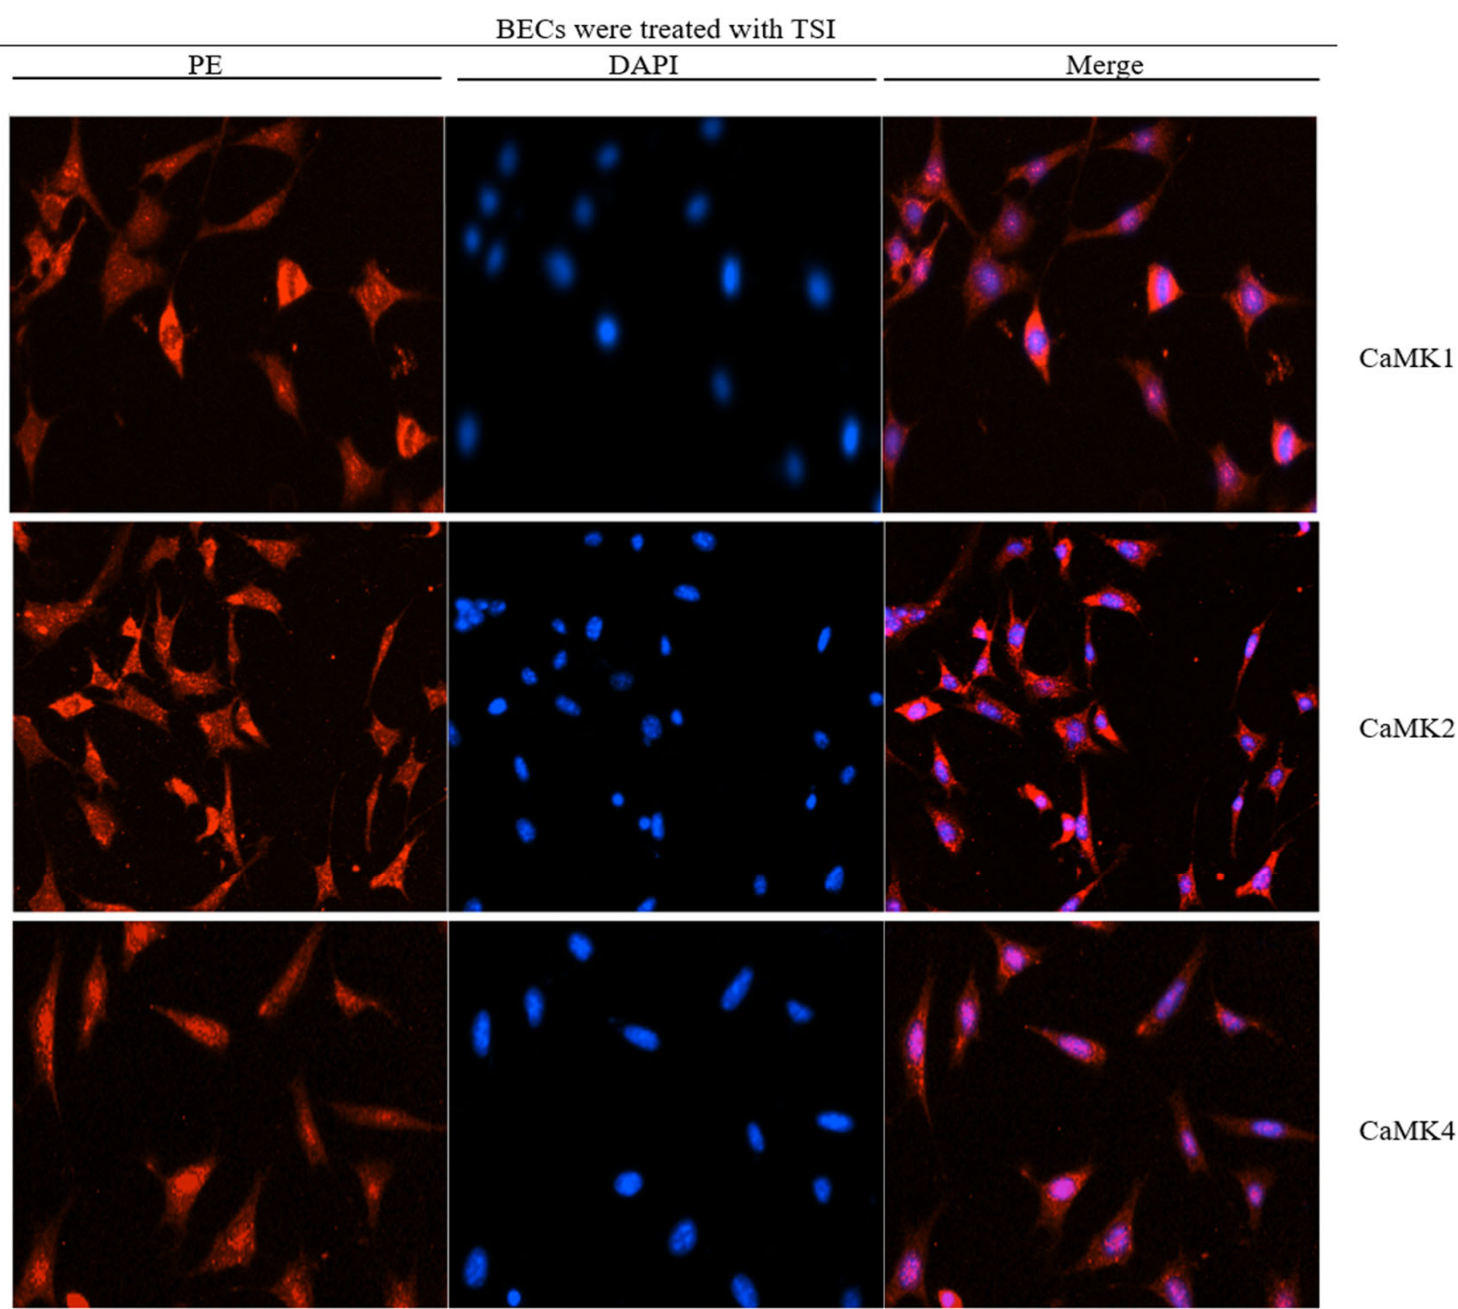

Supplement: s1 [file s1]
